# Supplementary material for: PPL2 Translesion Polymerase Is Essential for the Completion of Chromosomal DNA Replication in the African Trypanosome
Source: PubMed Central journal article supplement (PMC3898837; doi:10.1016/j.molcel.2013.10.034), 2013-11-21
Supplement: mmc1.pdf [file mmc1.pdf]

**Molecular Cell, Volume 52**

**Supplemental Information**

**PPL2 Translesion Polymerase Is Essential for the Completion of Chromosomal DNA Replication in the African Trypanosome**

Sean G. Rudd, Lucy Glover, Stanislaw K. Jozwiakowski, David Horn, and Aidan J. Doherty

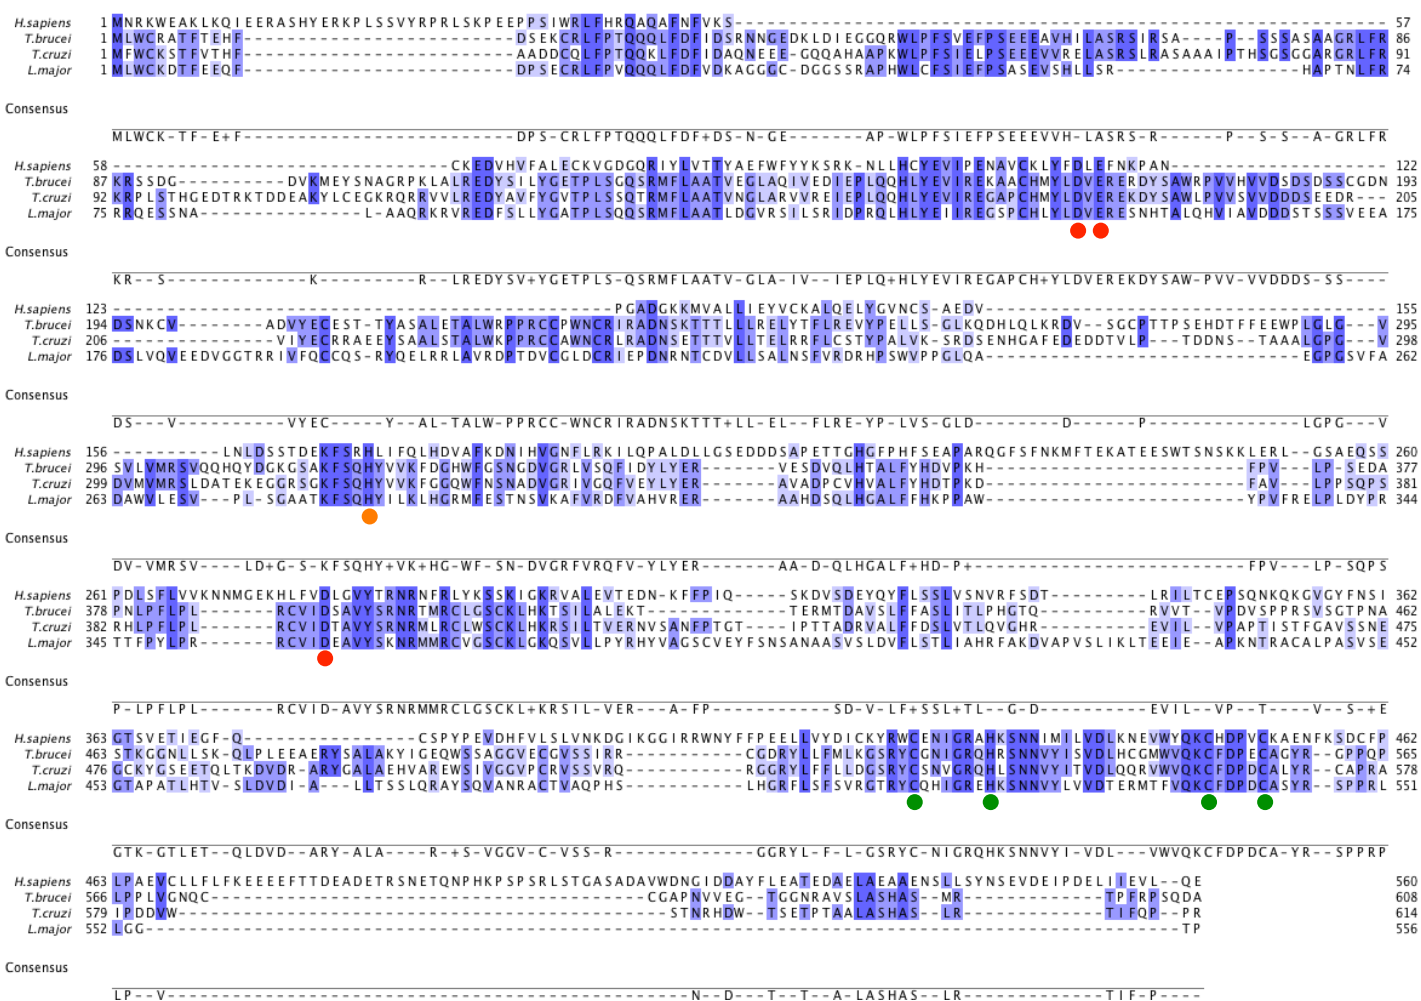

**Figure S1. Sequence alignment of trypanosomatid PrimPol-like 1 family (linked with Figure 1)**  
Multiple sequence alignment of human PrimPol and the *T. brucei*, *T. cruzi*, and *L. major* PPL1 proteins. Predicted essential residues in the AEP domain are indicated, residues in motifs I and III (red circles) required for magnesium ion binding, motif II (orange circle) for nucleotide binding. Residues required for chelation of zinc in the UL52 zinc finger are also indicated (green circles).

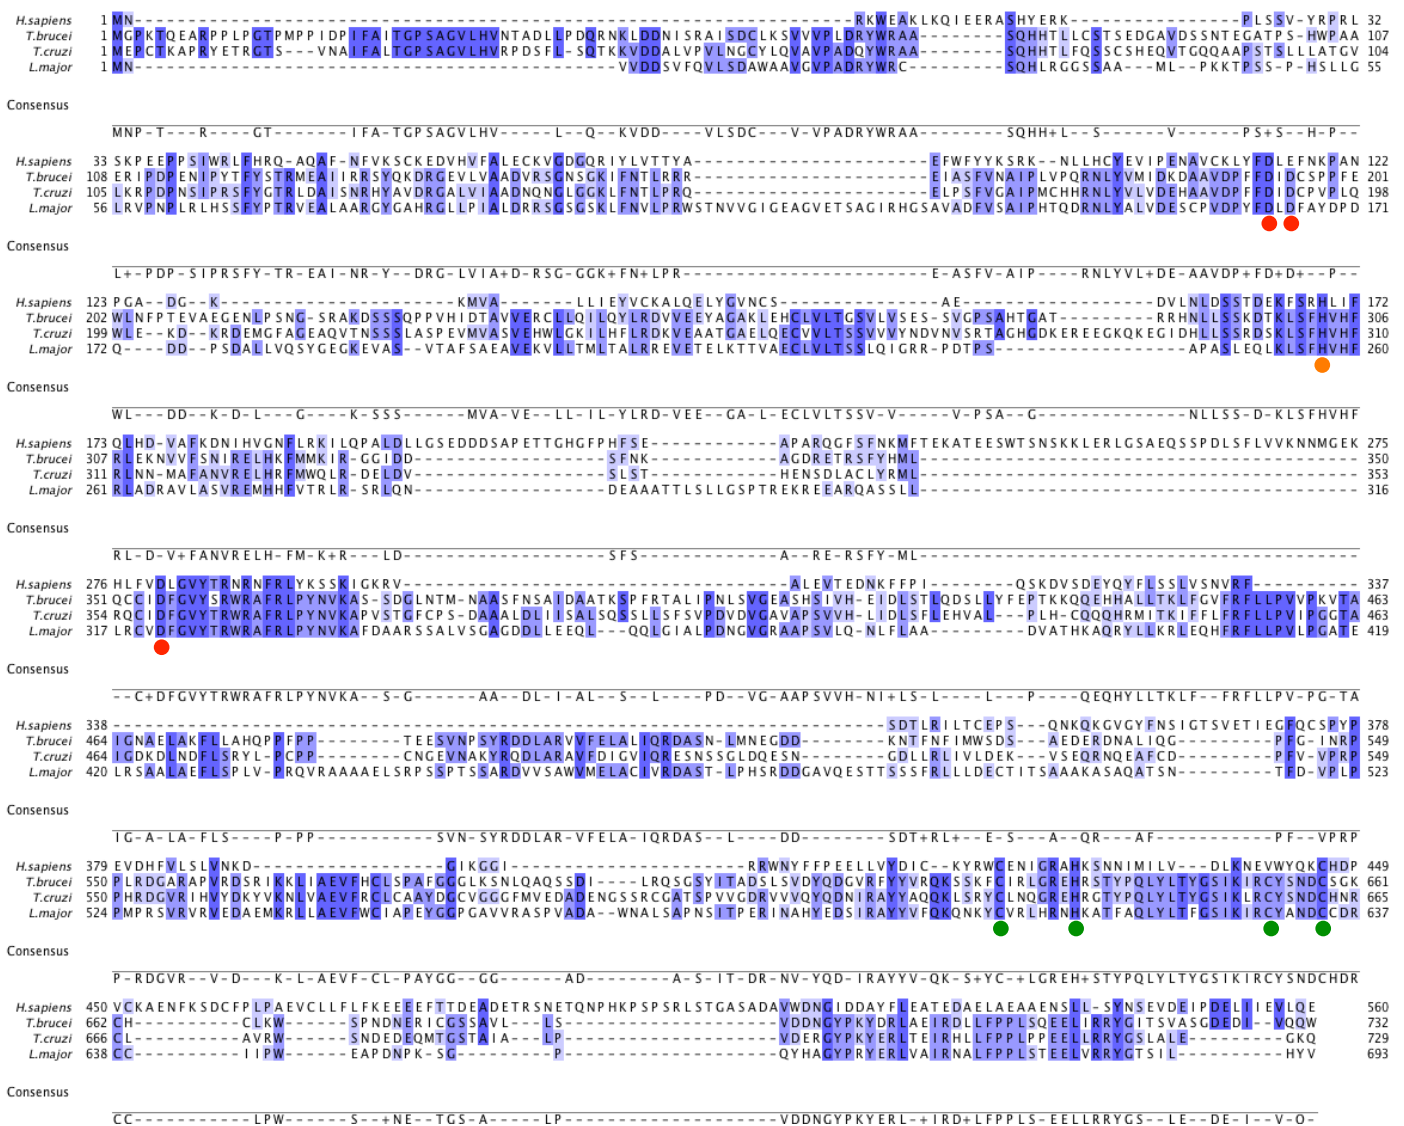

**Figure S2. Sequence alignment of trypanosomatid PrimPol-like 2 family (linked with Figure 1)**  
Multiple sequence alignment of human PrimPol and the *T. brucei*, *T. cruzi*, and *L. major* PPL2 proteins. Predicted essential residues in the AEP domain are indicated, residues in motifs I and III (red circles) required for magnesium ion binding, motif II (orange circle) for nucleotide binding. Residues required for chelation of zinc in the UL52 zinc finger are also indicated (green circles).

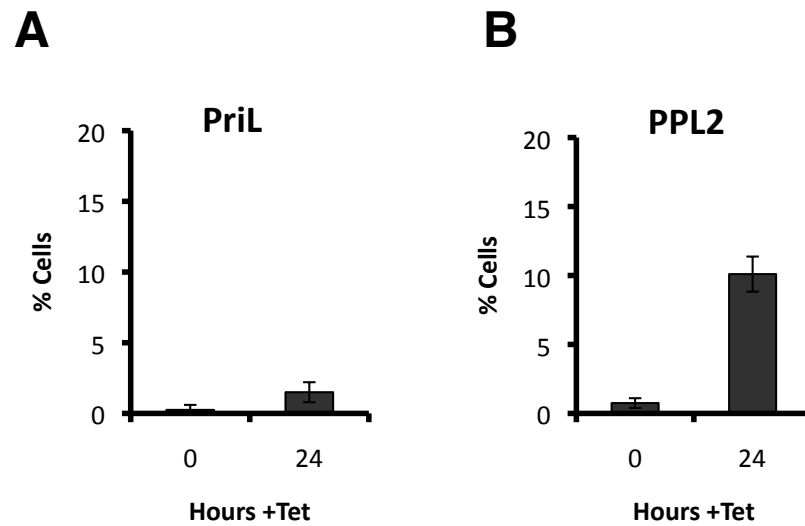

**Figure S3. TbPPL2 knockdown increases nuclear TUNEL staining (linked with Figure 4)**

Cultures of TbPriL (A) and TbPPL2 (B) inducible RNAi strains were grown in the presence or absence of 1  $\mu$ g/ml tetracycline for 24 hours and then fixed. Cells were permeabilised and free 3' OH ends of DNA were labelled with fluorescein-labelled nucleotides by TdT for 1 hour (TUNEL method). Cells were then counterstained with DAPI and analysed by fluorescence microscopy and the proportion of cells with nuclear TUNEL staining calculated. Two experiments were performed for each RNAi strain, counting at least 200 cells each time. Error bars represent standard deviation.

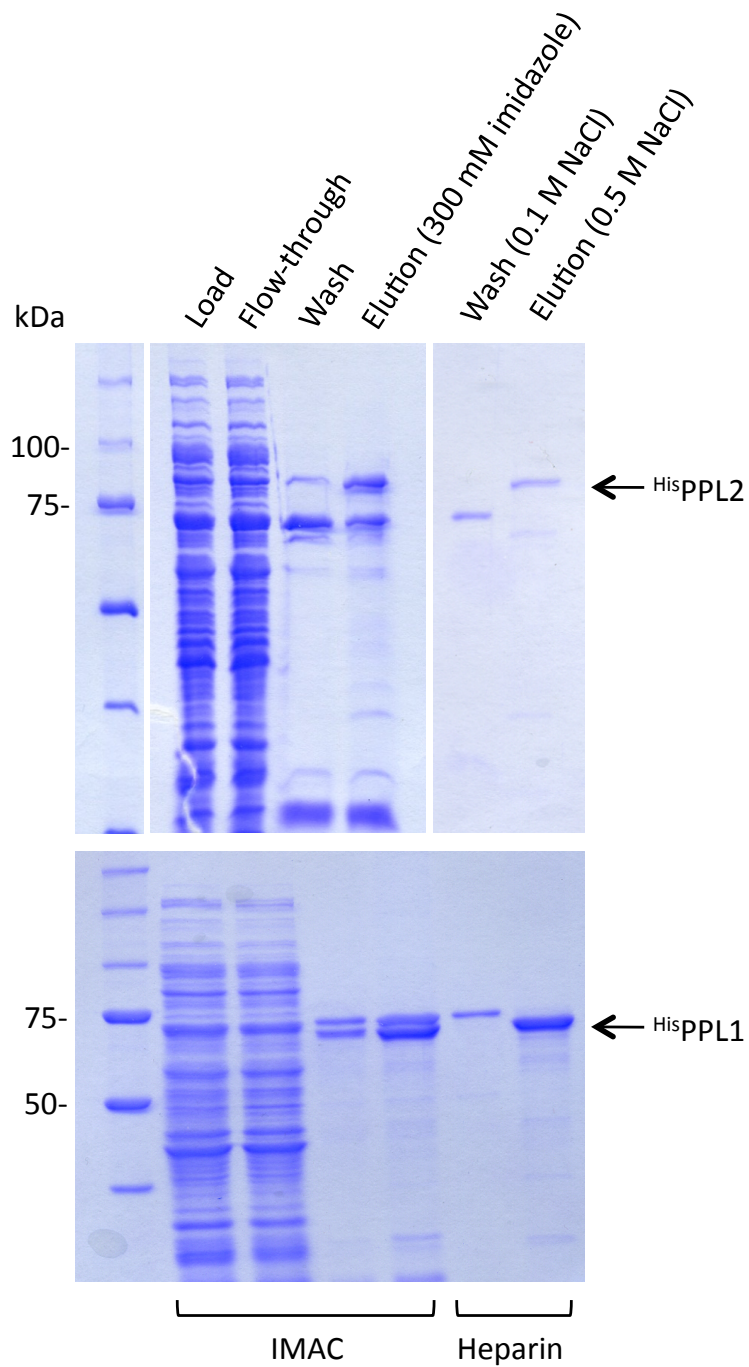

**Figure S4. Preparation of recombinant TbPPL1 and 2 (linked with Figure 5)**

Recombinant His-TbPPL1 and 2 were purified from over-expressing *E. coli* cell extracts using nickel-chelate and heparin chromatography. Samples from each purification step were analysed by SDS-PAGE and Coomassie blue staining. See Supplementary Experimental Procedures for further detail.

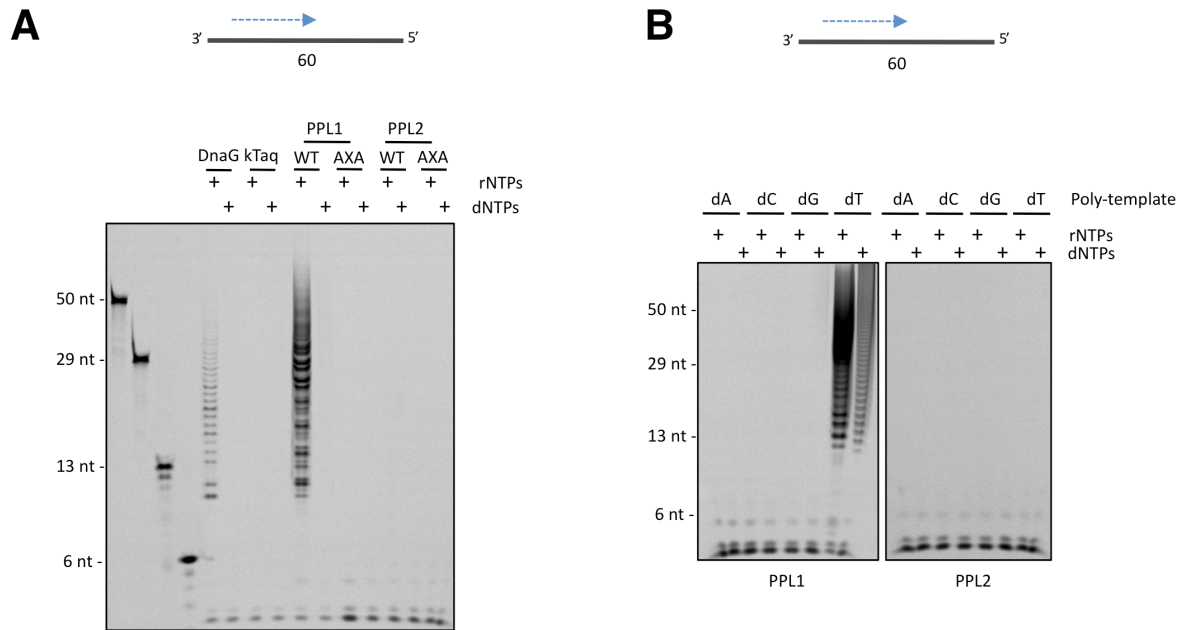

**Figure S5. Supplementary primase assays (linked with Figure 5)**

Primer synthesis by His-TbPPL1 and 2 on a (A) d(TCC)<sub>20</sub> template or (B) dA, dC, dG, dT homopolymer templates as indicated. DNA templates (500 nM) were incubated with either dNTPs or rNTPs (500 μM) and TbPPL1 or 2 (1 μM) for 2 hours at 37°C. Products were detected as described in Experimental Procedures. Recombinant *Bacillus stearothermophilus* DnaG primase (1 μM) was used as a positive control for primer synthesis, and klenow-Taq (kTAQ) DNA polymerase (1 μM), which is used in the primer-labelling step, as a negative control.

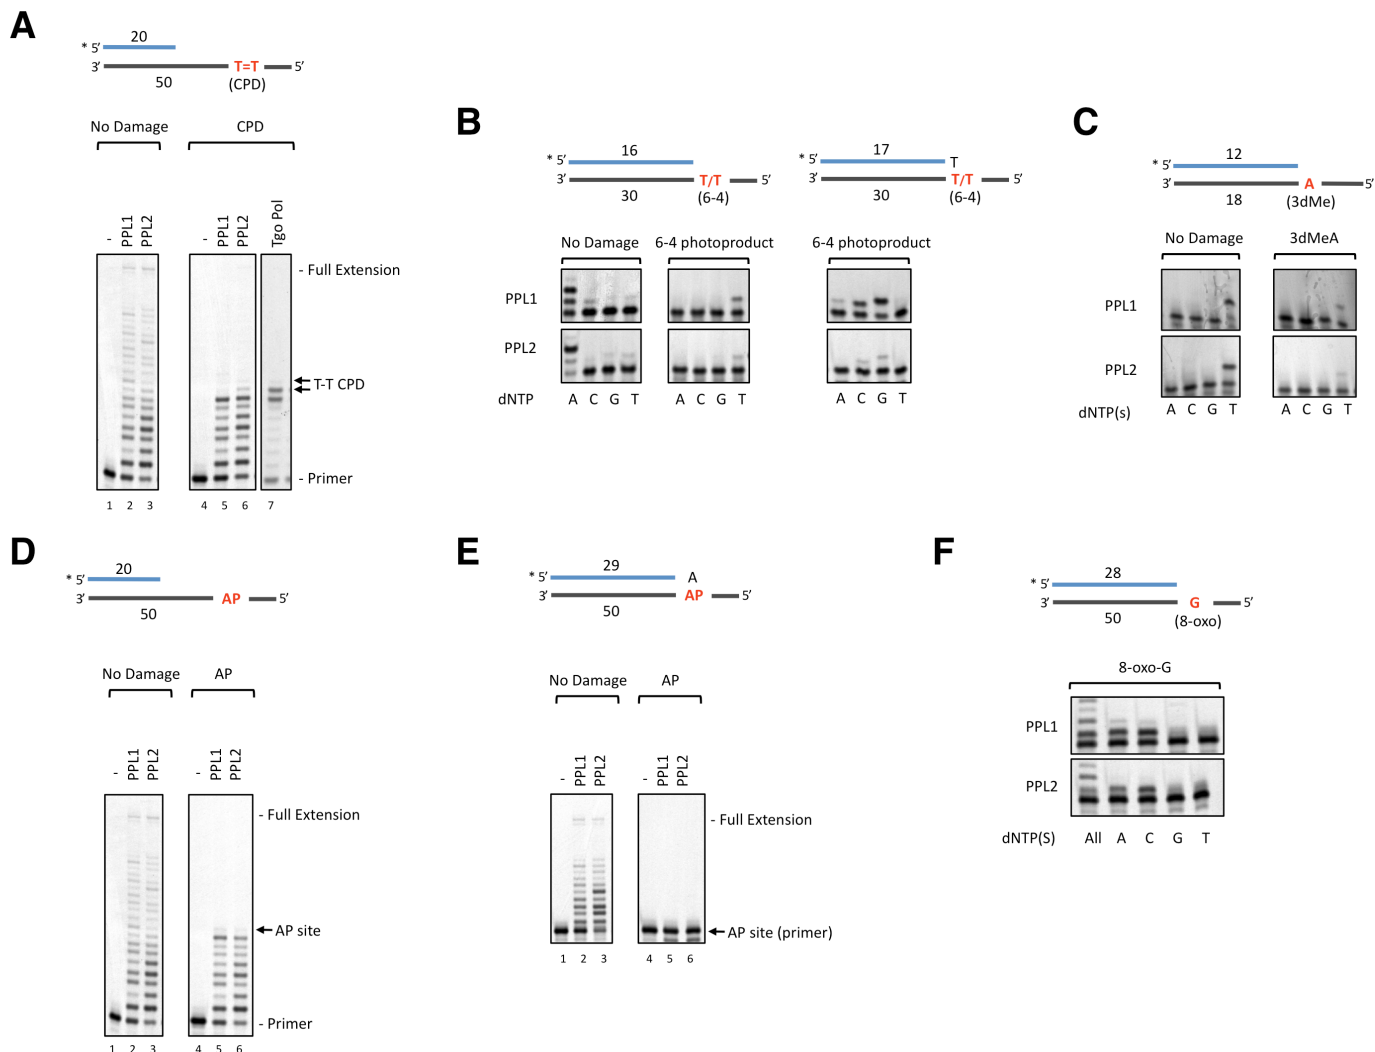

**Figure S6. Supplementary primer extension assays with lesion-containing templates (linked with Figure 5)**

Primer extensions with substrates containing templated DNA lesions: **(A)** *cis-syn* cyclobutane pyrimidine dimer (CPD), **(B)** pyrimidine (6-4) pyrimidone photoproduct (6-4 PP), **(C)** 3-deaza 3-methyladenine (3dMeA), **(D and E)** abasic (AP) site, and **(F)** an 8-oxo-2'-deoxyguanosine (8-oxo-G). Primer template substrates (20 nM) were incubated with dNTP(s) (200  $\mu$ M) and TbPPL1 or 2 (125 nM) for 30 minutes at 37°C. Each substrate is represented schematically indicating the 5' fluorescent label on the primer strand (asterisk), the location of the templated DNA lesion, and the 3' terminal residues of the primer strand if relevant.

| Gene         | Purpose                                                                                                                                    | Primer Sequence (5'-3')                                                                | Restriction sites            | Vector (entry)       |
|--------------|--------------------------------------------------------------------------------------------------------------------------------------------|----------------------------------------------------------------------------------------|------------------------------|----------------------|
| PPL1         | RNAi                                                                                                                                       | GATC <b><u>TCTAGAGGATCC</u></b> TGCATCGCTCATTACTTTGC                                   | <b>XbaI</b> <b>BamHI</b>     | pRPa <sup>iSL</sup>  |
|              |                                                                                                                                            | GATC <b><u>CCTCGAGGTACC</u></b> GTTGCGGTGGTCTCTGTAT                                    | <b>XhoI</b> <b>KpnI</b>      |                      |
|              | Tagging                                                                                                                                    | GATC <b><u>GGCGCGCC</u></b> GCTTGGTTGGGCG                                              | <b>AscI</b>                  | pNAT <sup>x12M</sup> |
|              |                                                                                                                                            | GATC <b><u>TCTAGA</u></b> AAGCGTCCTGCGACGGAC                                           | <b>XbaI</b>                  |                      |
|              | Cloning                                                                                                                                    | GCT <b><u>CATATG</u></b> CTCTGGTGTAGGGCAACG                                            | <b>NdeI</b>                  | pET28a               |
| AxA mutation | <b><u>CGGATCC</u></b> CTAAGCGTCCTGCGACG<br>GTATTTGG <b>cc</b> GTT <b>Gct</b> CGGGAGAGG<br>GTATTTGG <b>cc</b> GTT <b>Gct</b> CGGGAGAGG      | <b>BamHI</b>                                                                           |                              |                      |
| PPL2         | RNAi                                                                                                                                       | GATC <b><u>TCTAGAGGATCC</u></b> AGACGGCATAATCTGCTCA                                    | <b>XbaI</b> <b>BamHI</b>     | pRPa <sup>iSL</sup>  |
|              |                                                                                                                                            | GATC <b><u>CCTCGAGGTACC</u></b> ATGGCTGTTACTTTGGGCAC                                   | <b>XhoI</b> <b>KpnI</b>      |                      |
|              | Tagging                                                                                                                                    | GATCA <b><u>AAGCTT</u></b> CATCATGTGGAGTGATT                                           | <b>HindIII</b>               | pNAT <sup>x12M</sup> |
|              |                                                                                                                                            | GATC <b><u>TCTAGA</u></b> CCACTGTTGGACGATATCT                                          | <b>XbaI</b>                  |                      |
|              | Cloning                                                                                                                                    | <b><u>CGGATCC</u></b> CTAAGCGTCCTGCGACG<br><b><u>CGAATTC</u></b> TCACCACTGTTGGACGATATC | <b>BamHI</b><br><b>EcoRI</b> | pET28a               |
| AxA mutation | CCTTTTTTC <b>cg</b> ATAG <b>cg</b> CTGCAGCCCACCGTTTGAGTGGTTGAATTTCC<br>GTGGGCTGCAG <b>g</b> CTAT <b>cg</b> CGAAAAAAGGGTCAACTGCGGCGTCTTTATC |                                                                                        |                              |                      |
| PriL         | RNAi                                                                                                                                       | GATC <b><u>TCTAGAGGATCC</u></b> TTTTGTTTTCTGCATGAGCG                                   | <b>XbaI</b> <b>BamHI</b>     | pRPa <sup>iSL</sup>  |
|              | Tagging                                                                                                                                    | GATC <b><u>CCTCGAGGTACC</u></b> AAGTGTGTCTGCGCAAGATG                                   | <b>XhoI</b> <b>KpnI</b>      | pNAT <sup>x12M</sup> |
|              |                                                                                                                                            | GATCA <b><u>AAGCTT</u></b> CGGCTGGTGCTG                                                | <b>HindIII</b>               |                      |
|              |                                                                                                                                            | GATC <b><u>TCTAGACAAAGAATCACGCGGACGG</u></b>                                           | <b>XbaI</b>                  |                      |

**Table S1. Primers used to generate constructs.** Restriction sites are underlined or in bold; mutations are in lowercase and in bold.



|                              | <b>Length</b> | <b>Sequence (5'-3')</b>                             | <b>Modification</b> |
|------------------------------|---------------|-----------------------------------------------------|---------------------|
| <b>Template</b>              | 50            | CGCGCAGGGCGCACAAACAGCCTTGAAGACCGAACGACCGAACAGACGACA | No damage           |
|                              | 50            | CGCGCAGGGCGCACAAACAGCCTTGAAGACCGAACGACCGAACAGACGACA | CDP (TT)            |
|                              | 50            | CGCGCAGGGCGCACAAACAGCCGTGAAGACCGAACGACCGAACAGACGACA | 8-oxo-G (G)         |
|                              | 50            | CGCGCAGGGCGCACAAACAGCC_TGAAGACCGAACGACCGAACAGACGACA | AP site (L)         |
| <b>Primer (5' HEX label)</b> | 20            | TGTCGTCTGTTCCGGTCGTTCC                              |                     |
|                              | 28            | TGTCGTCTGTTCCGGTCGTTCCGGTCTTCA                      |                     |
|                              | 29            | TGTCGTCTGTTCCGGTCGTTCCGGTCTTCAA                     |                     |
| <b>Template</b>              | 30            | CTCGTCAGCATCTTCATCATAACAGTCAGTG                     | No damage           |
|                              | 30            | CTCGTCAGCATCTTCATCATAACAGTCAGTG                     | 6-4 PP (TT)         |
| <b>Primer (5' HEX label)</b> | 16            | CACTGACTGTATGATG                                    |                     |
|                              | 17            | CACTGACTGTATGATGT                                   |                     |
| <b>Template</b>              | 18            | AGACGACGTCCTGTAGCC                                  | No damage           |
|                              | 18            | AGACGACGTCCTGTAGCC                                  | 3dMeA (A)           |
| <b>Primer (5' HEX label)</b> | 12            | GGCTACAGGACG                                        |                     |

**Table S2. Primer and template strands for primer extension assays.** DNA lesions in templates are indicated in red text: CPD, cyclobutane pyrimidine dimer; 8-oxo-G, 8-oxo-guanine; AP site, abasic site; 6-4 PP, pyrimidine pyrimidone 6-4 photoproduct; 3dMeA, 3-deaza 3-methyladenine. Primers contain a 5' hexachlorofluorescein (HEX) label.



## SUPPLEMENTARY EXPERIMENTAL PROCEDURES

### Preparation of recombinant TbPPL1 and 2

For purification of TbPPL1 and 2, constructs encoding the 6-Histidine tagged WT or AxA TbPPL1 or 2 were first transformed into *E. coli* B843 DE3 pLysS (B834s). Typically 3 litre cultures supplemented with relevant antibiotics and 100  $\mu\text{M}$   $\text{ZnSO}_4$  were grown at 37°C to exponential phase and induced with 1 mM IPTG for 3 hours at 25°C before harvesting. Cell pellets were lysed in immobilised metal affinity chromatography (IMAC) buffer A (50 mM Tris-HCl pH 7.5, 0.5 M NaCl, 30 mM Imidazole, 10% Glycerol, 17  $\mu\text{g/ml}$  PMSF, 34  $\mu\text{g/ml}$  Benzamidine, 5 mM 2-mercaptoethanol), sonicated and cleared by centrifugation. The soluble fraction was loaded onto an IMAC column charged with nickel ( $\text{Ni}^{2+}$ )-NTA resin (Qiagen), washed with buffer A and then 10% IMAC buffer B (same as buffer A except 300 mM Imidazole). TbPPLs were eluted with 100% buffer B (300 mM imidazole), diluted 10-fold with Heparin buffer A (50 mM Tris-HCl pH7.5, 10% Glycerol, 2 mM DTT), and loaded onto a Heparin HiTrap HP chromatography column (GE Healthcare). Following a 10% Heparin buffer B wash (same as buffer A except 1M NaCl), TbPPLs were eluted in 50% B (0.5 M NaCl), concentrated and snap frozen in aliquots to be stored at -80°C.

### Flourescent primase assay

Sequences of oligonucleotides used in Table S3. The non-radioactive primase assay was performed in three steps. Typically 1  $\mu\text{M}$  of the tested enzyme or 2 U of klenow-Taq (negative control for the assay; purified as described in Engelke et al., 1990) in 20  $\mu\text{l}$  reaction volume containing 500 nM ssDNA synthetic template with a biotin modification at the 5' end, 500  $\mu\text{M}$  rNTPs (Invitrogen) or 500  $\mu\text{M}$  dNTPs (Roche), 10 mM Bis-Tris-Propane-HCl pH7, 10 mM  $\text{MgCl}_2$ , 50 mM NaCl, was incubated for 2 hours at 37°C. The reaction was then supplemented with 0.2 U of kTaq and 15  $\mu\text{M}$  FAM-6-dATP (Jena-Biosciences) and incubated at 37°C for 45 minutes to allow fluorescent labelling of *de novo* synthesised primers. The primer synthesis/labelling enzymatic reactions were terminated by adding 450  $\mu\text{l}$  of binding-washing (B-W) buffer (10 mM Tris-HCl 8.0, 500 mM NaCl, 10 mM EDTA). The quenched reactions were added to ~30  $\mu\text{l}$  of streptavidin coated beads (500  $\mu\text{l}$  total volume) and mixed on a spinning wheel for 1 hour at 4°C. After capturing the ssDNA templates, the suspension was spun down briefly to sediment the beads. The supernatant was removed and the beads were washed three times with 1 ml of B-W buffer. The beads were then suspended in 20  $\mu\text{l}$  of 8 M UREA 10 mM EDTA and boiled for 3 minutes to liberate the primers. The 20  $\mu\text{l}$  samples were spun down briefly, loaded on 15% polyacrylamide / 7M urea gel and resolved for 1h 45min at 17 watts. After

electrophoresis, gels were scanned for fluorescent signal and products of reaction/labelling of *de novo* synthesised primers were visualised. Recombinant *Bacillus sterothermophilus* DnaG (Bst-DnaG) was a gift from Kenneth Mariani (Memorial Sloan-Kettering Cancer Center, New York).

## **SUPPLEMENTARY REFERENCES**

Engelke, D. R., Krikos, A., Bruck, M. E., and Ginsburg, D. (1990). Purification of *Thermus aquaticus* DNA polymerase expressed in *Escherichia coli*. *Anal. Biochem.* *191*, 396-400.
